# Supplementary material for: Posttranslational modifications of α-conotoxins: sulfotyrosine and C-terminal amidation stabilise structures and increase acetylcholine receptor binding
Source: Royal Society of Chemistry journal article supplement (doi:10.1039/d1md00182e), 2021-01-01
Supplement: d1md00182e1.pdf [file d1md00182e1.pdf]

**Supplementary Data for:**

**Posttranslational modifications of  $\alpha$ -conotoxins: Sulfotyrosine and  
C-terminal amidation stabilise structures and increase  
acetylcholine receptor binding**

Thao N. T. Ho<sup>1†</sup>, Han Siean Lee<sup>2†</sup>, Shilpa Swaminathan<sup>2</sup>, Lewis Goodwin<sup>2</sup>, Nishant Rai<sup>2</sup>,  
Brianna Ushay<sup>2</sup>, Richard J. Lewis<sup>1</sup>, K. Johan Rosengren<sup>2</sup>, and Anne C. Conibear<sup>2\*</sup>

<sup>1</sup> The University of Queensland, The Institute for Molecular Bioscience, St Lucia 4072,  
Brisbane, Australia.

<sup>2</sup> The University of Queensland, School of Biomedical Sciences, St Lucia 4072, Brisbane,  
Australia.

\*Corresponding author:

Anne C. Conibear

The University of Queensland, School of Biomedical Sciences, St Lucia 4072, Brisbane,  
Australia.

E-mail: [a.conibear@uq.edu.au](mailto:a.conibear@uq.edu.au)

## 1. Mass spectra and analytical HPLC analyses of EpI, AnIB and PnIA variants.

ESI mass spectra were obtained in positive ion mode unless marked otherwise. Intensities were normalised to the highest intensity peak. Analytical RP-HPLC was carried out on a C18 analytical HPLC column (C18, 300 Å, 300 x 4.6 mm, 5 µm) using a 2%/min gradient of acetonitrile (0.045% TFA) in water (0.05% TFA). UV absorbance was detected at 214 nm (black traces) and 280 nm (red traces).

### EpI[Y(SO<sub>3</sub>)15Y]-OH

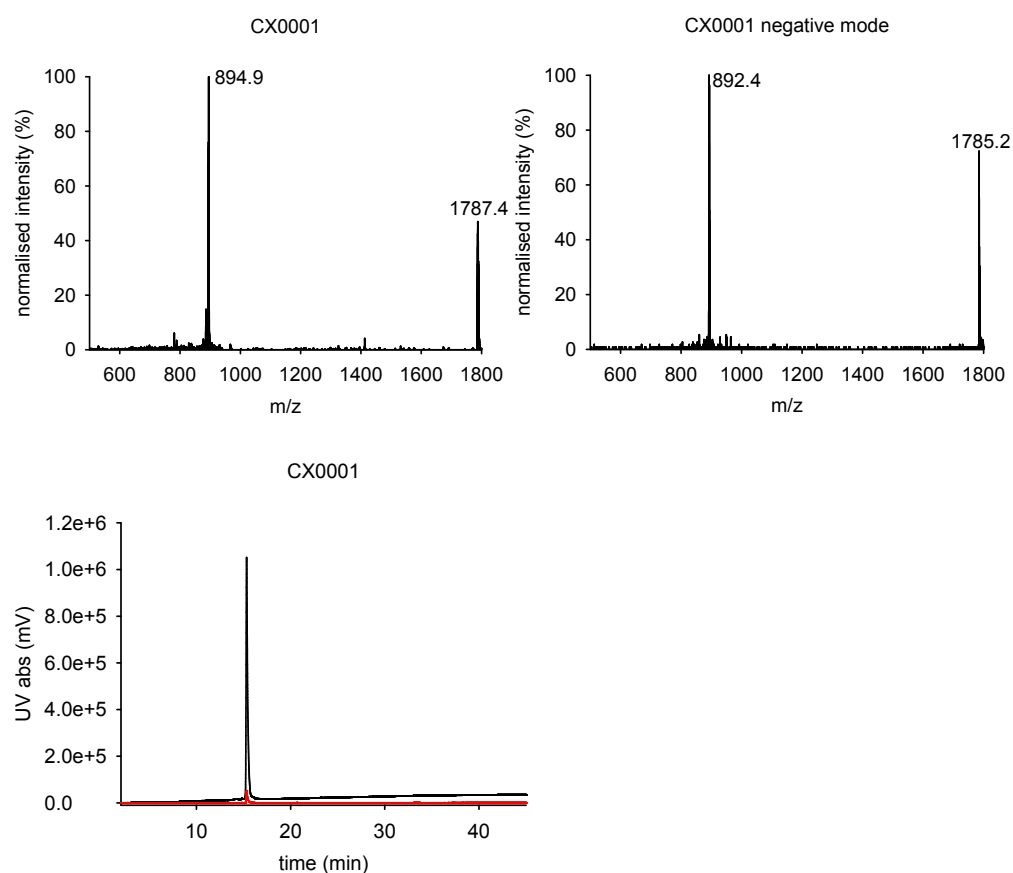

**Figure S1a.** Mass spectra in positive and negative mode and analytical RP-HPLC trace for EpI[Y(SO<sub>3</sub>)15Y]-OH.  $MW_{calc}$ : 1788.0,  $MW_{obs}$ : 1787.6.

## EpI[Y(SO<sub>3</sub>)<sub>15</sub>Y]-NH<sub>2</sub>

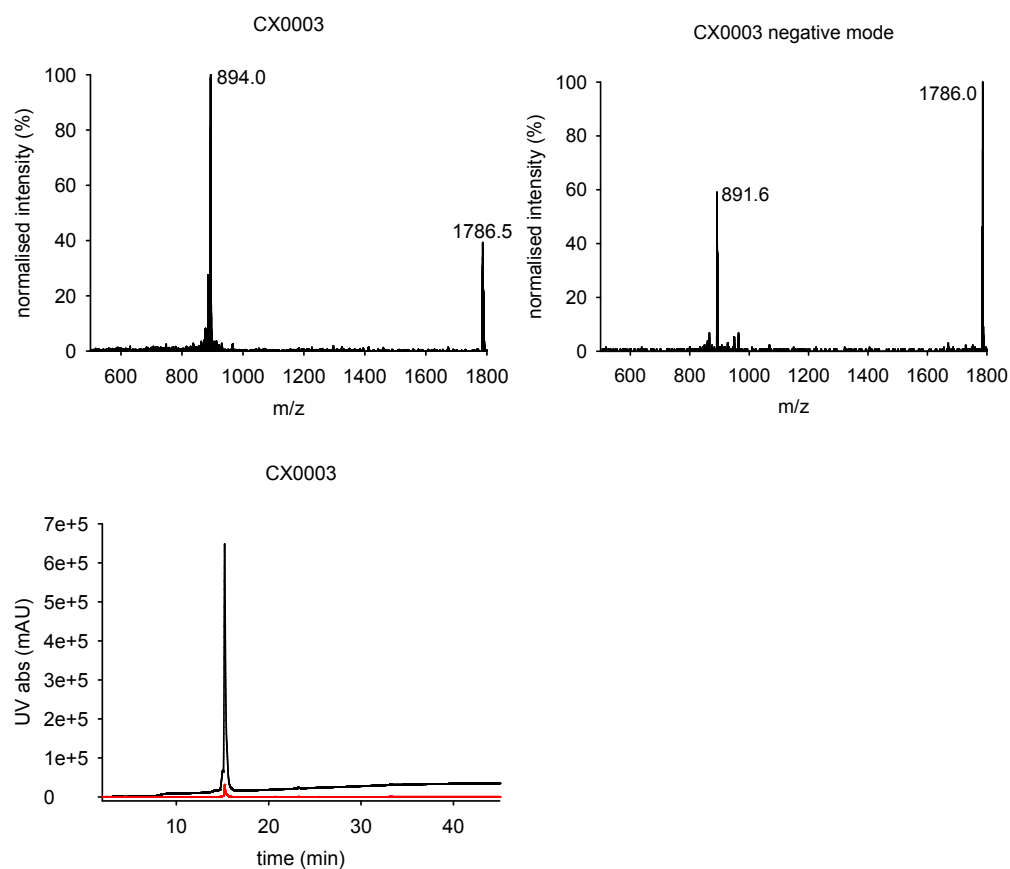

**Figure S1b.** Mass spectra in positive and negative mode and analytical RP-HPLC trace for EpI[Y(SO<sub>3</sub>)<sub>15</sub>Y]-NH<sub>2</sub>.  $MW_{calc}$ : 1787.0,  $MW_{obs}$ : 1786.3.

## EpI-OH

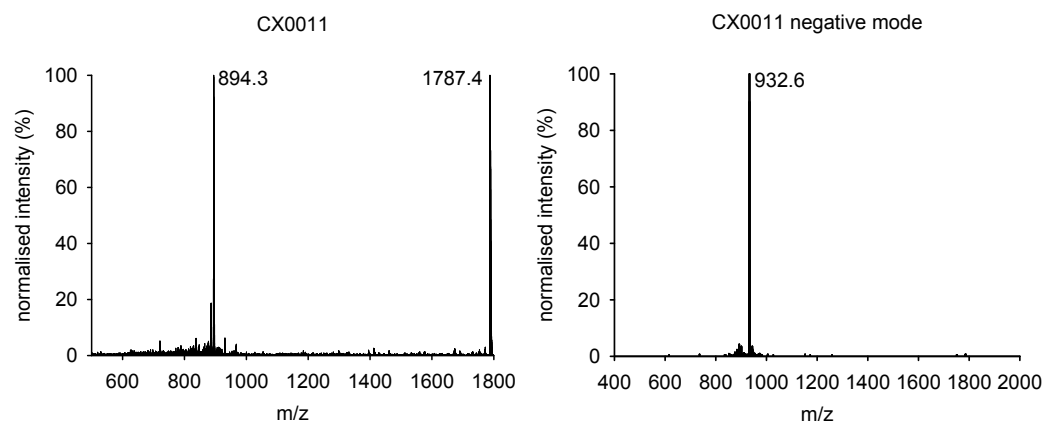

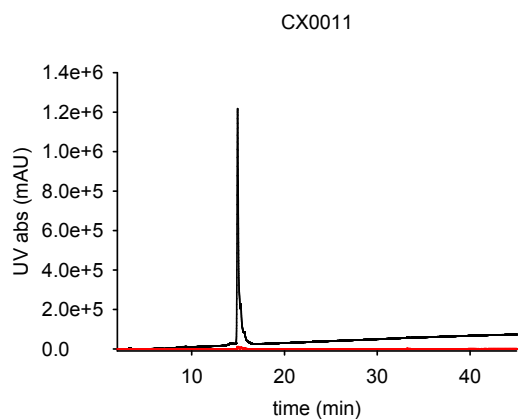

**Figure S1c.** Mass spectra in positive and negative mode and analytical RP-HPLC trace for *EpI-OH*.  $MW_{calc}$ : 1867.0,  $MW_{obs}$ : 1787.0 (positive mode); 1867.2 (negative mode).

### **EpI-NH<sub>2</sub>**

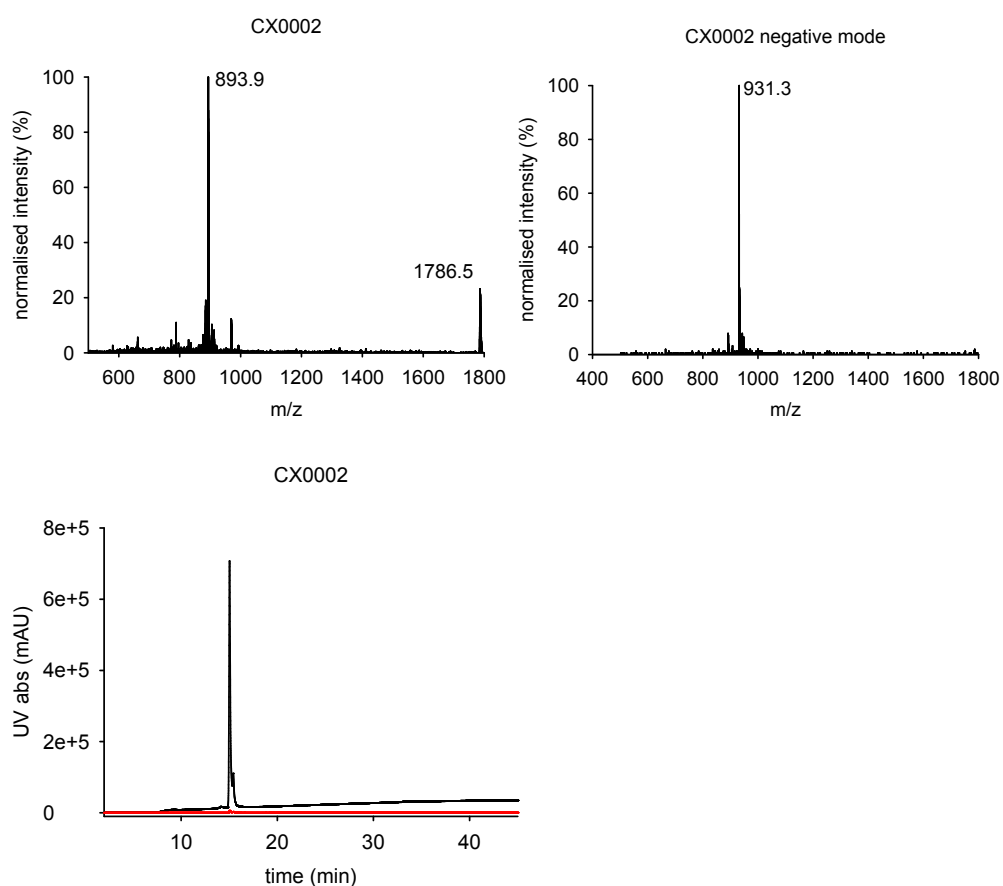

**Figure S1d.** Mass spectra in positive and negative mode and analytical RP-HPLC trace for *EpI-NH<sub>2</sub>*.  $MW_{calc}$ : 1866.0,  $MW_{obs}$ : 1786.2 (positive mode); 1864.6 (negative mode).

### AnIB[Y(SO<sub>3</sub>)<sub>16</sub>Y]-OH

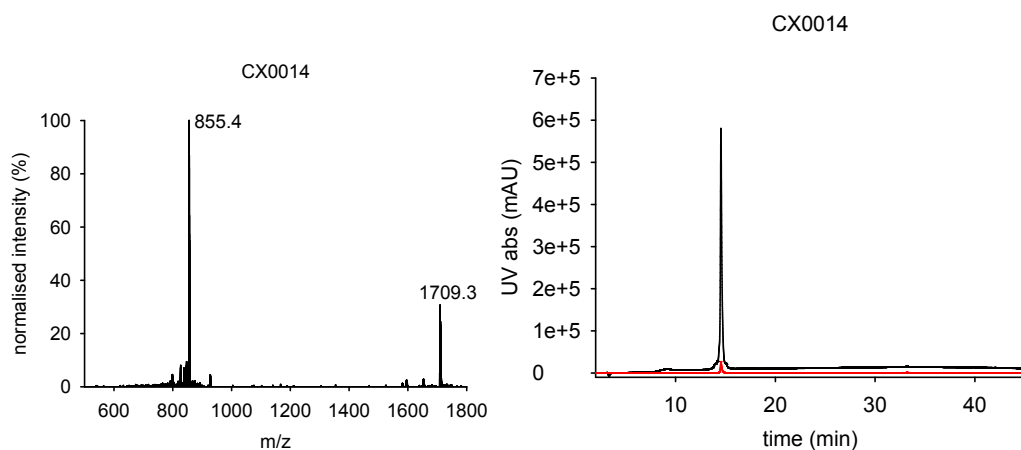

**Figure S1e.** Mass spectrum and analytical RP-HPLC trace for AnIB[Y(SO<sub>3</sub>)<sub>16</sub>Y]-OH.

$MW_{calc}$ : 1709.8,  $MW_{obs}$ : 1709.1.

### AnIB[Y(SO<sub>3</sub>)<sub>16</sub>Y]-NH<sub>2</sub>

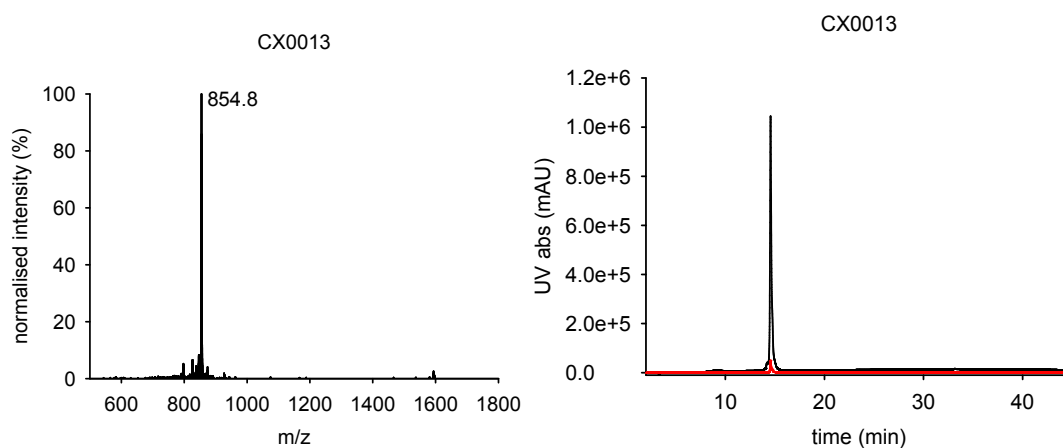

**Figure S1f.** Mass spectrum and analytical RP-HPLC trace for AnIB[Y(SO<sub>3</sub>)<sub>16</sub>Y]-NH<sub>2</sub>.

$MW_{calc}$ : 1708.8,  $MW_{obs}$ : 1707.6.

## AnIB-OH

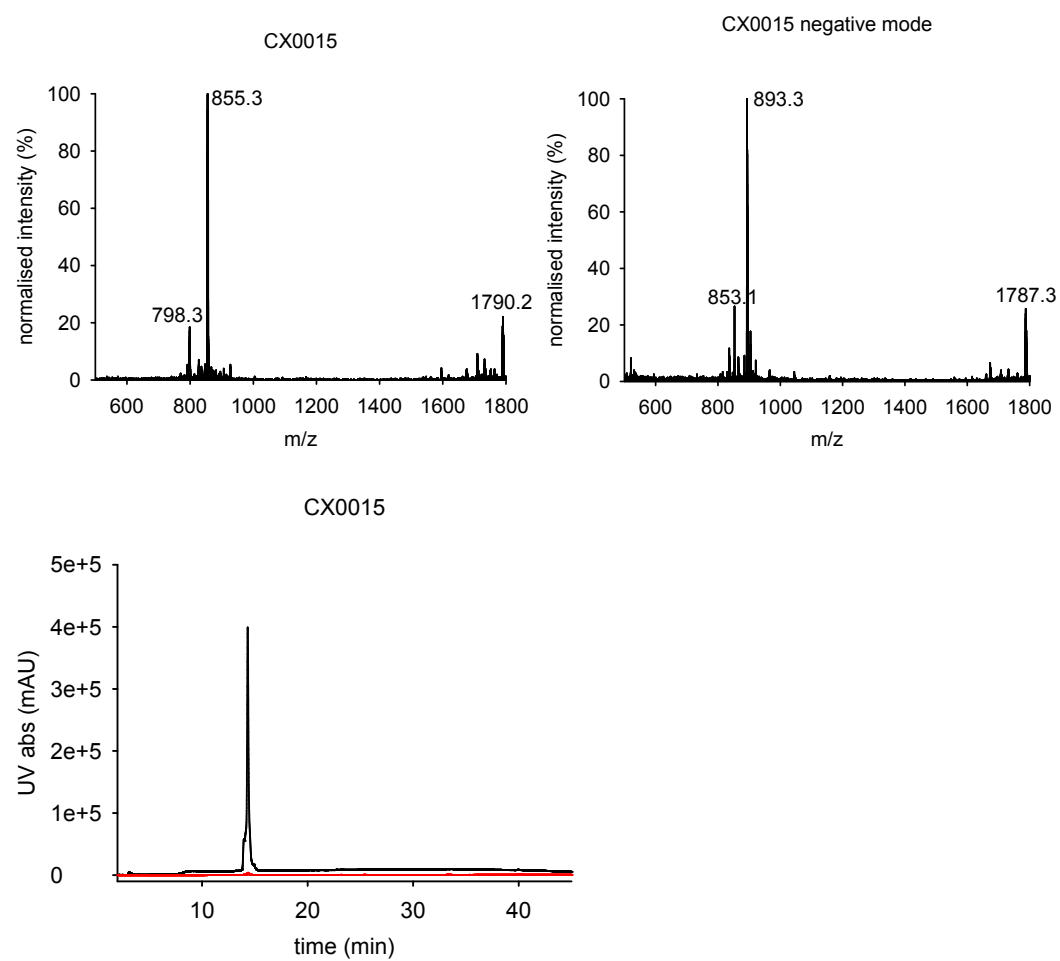

**Figure S1g.** Mass spectra in positive and negative mode and analytical RP-HPLC trace for AnIB-OH.  $MW_{calc}$ : 1788.9,  $MW_{obs}$ : 1708.6 (positive mode); 1788.5 (negative mode).

## AnIB-NH<sub>2</sub>

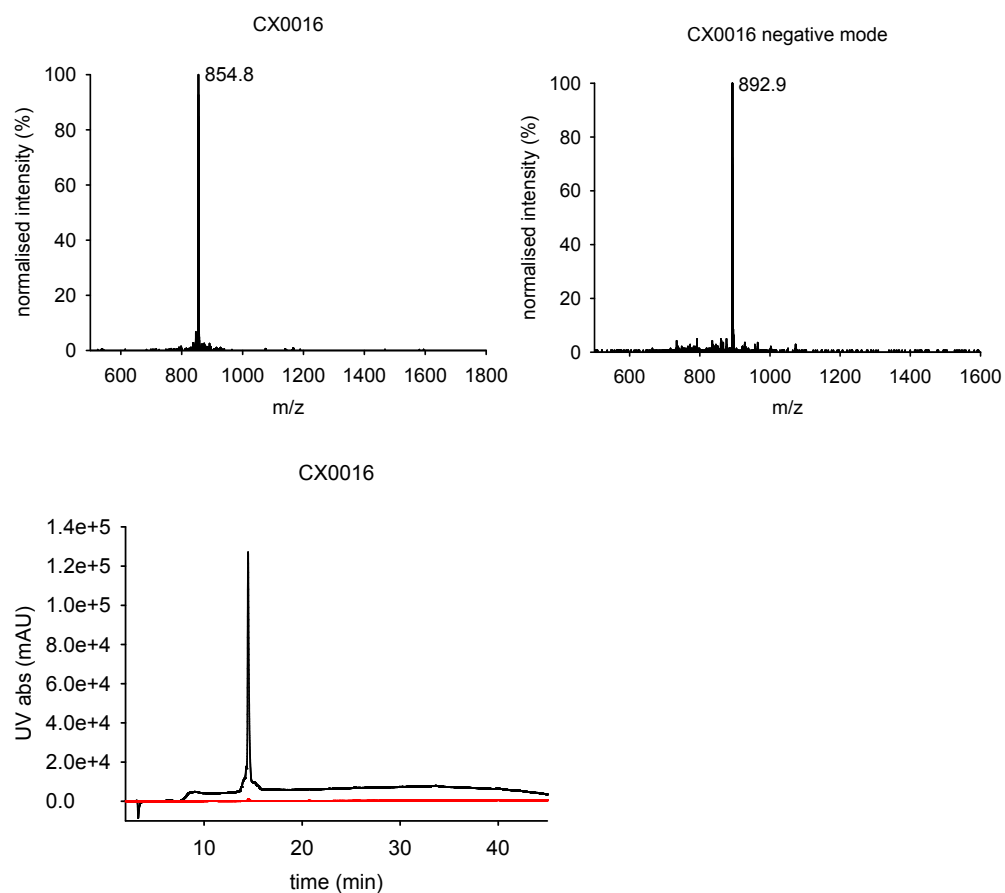

**Figure S1h.** Mass spectra in positive and negative mode and analytical RP-HPLC trace for AnIB-NH<sub>2</sub>.  $MW_{calc}$ : 1787.9,  $MW_{obs}$ : 1707.6 (positive mode); 1787.8 (negative mode).

## PnIA[Y(SO<sub>3</sub>)<sub>15</sub>Y]-OH

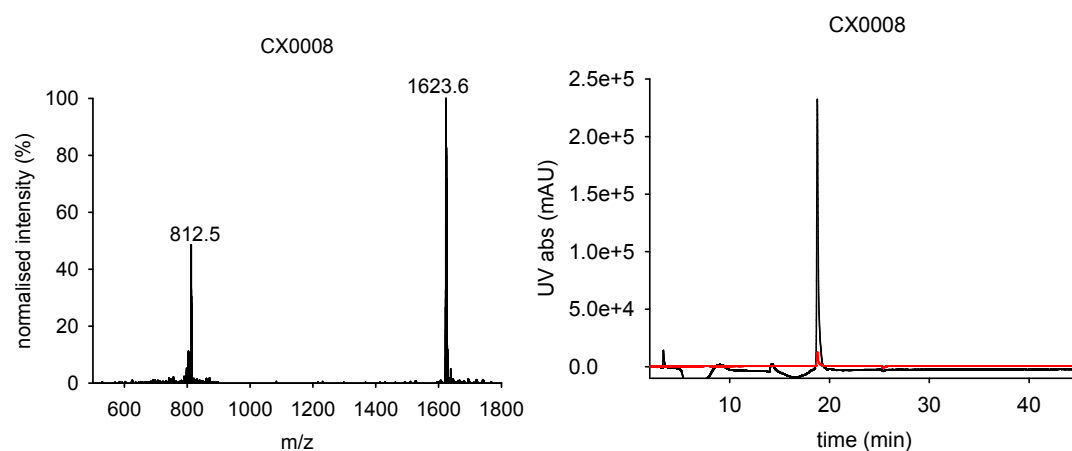

**Figure S1i.** Mass spectrum and analytical RP-HPLC trace for PnIA[Y(SO<sub>3</sub>)<sub>15</sub>Y]-OH.  $MW_{calc}$ : 1623.8,  $MW_{obs}$ : 1623.3.

## PnIA[Y(SO<sub>3</sub>)<sub>15</sub>Y]-NH<sub>2</sub>

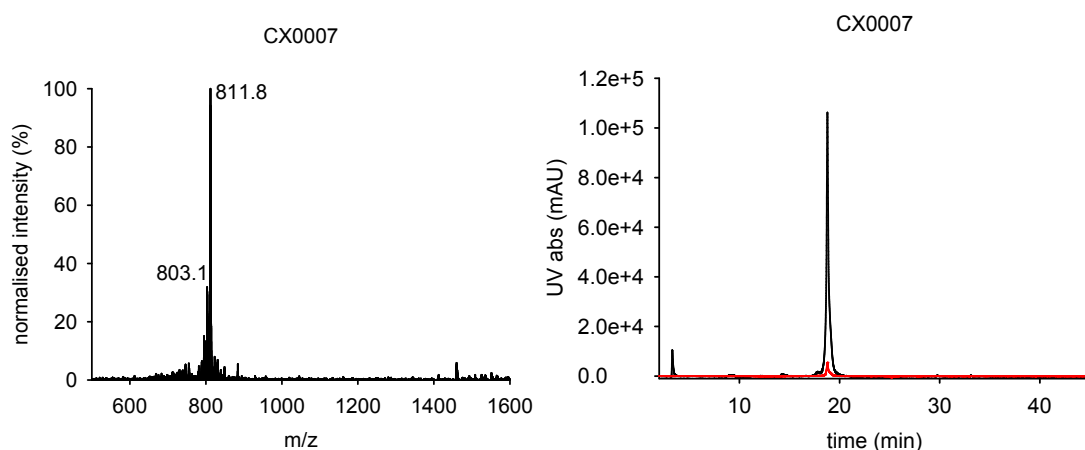

**Figure S1j.** Mass spectrum and analytical RP-HPLC trace for PnIA[Y(SO<sub>3</sub>)<sub>15</sub>Y]-NH<sub>2</sub>.

$MW_{calc}$ : 1622.8,  $MW_{obs}$ : 1621.6.

## PnIA-OH

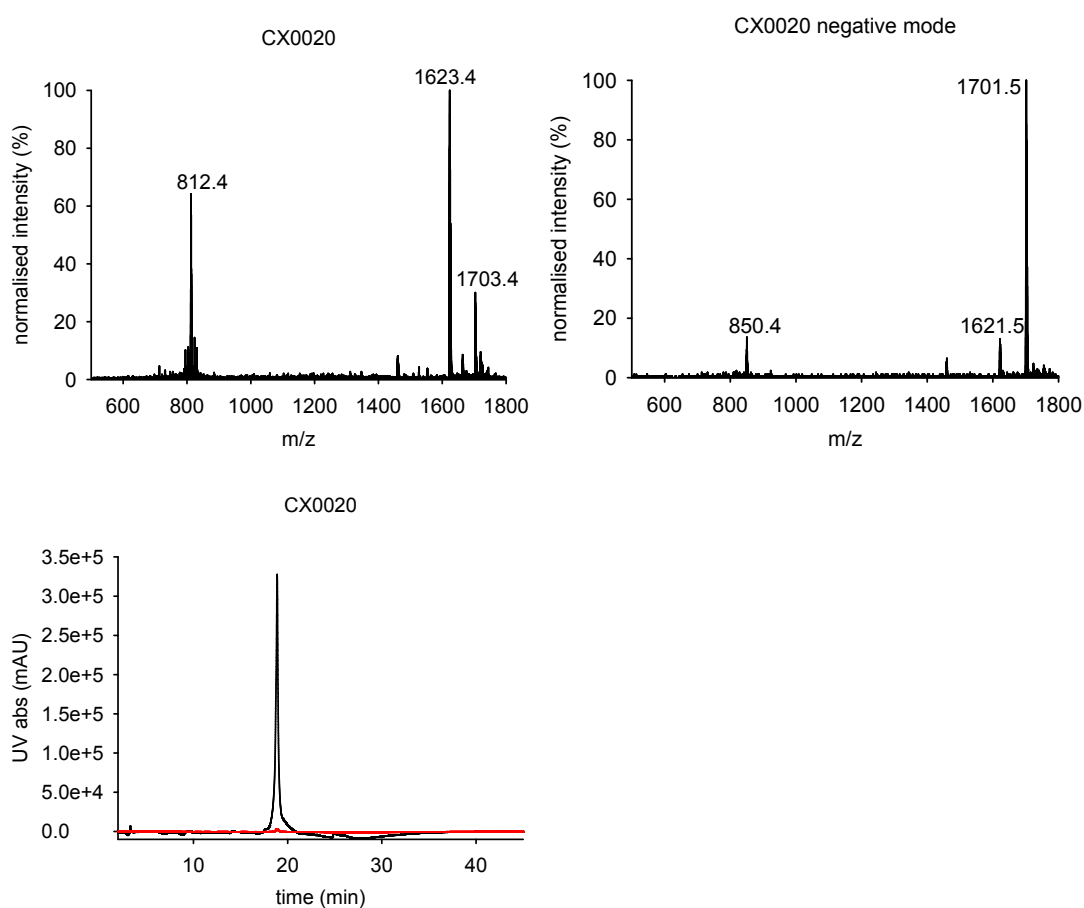

**Figure S1k.** Mass spectra in positive and negative mode and analytical RP-HPLC trace for

PnIA-OH.  $MW_{calc}$ : 1702.9,  $MW_{obs}$ : 1623.1 (positive mode); 1702.7 (negative mode).



## PnIA-NH<sub>2</sub>

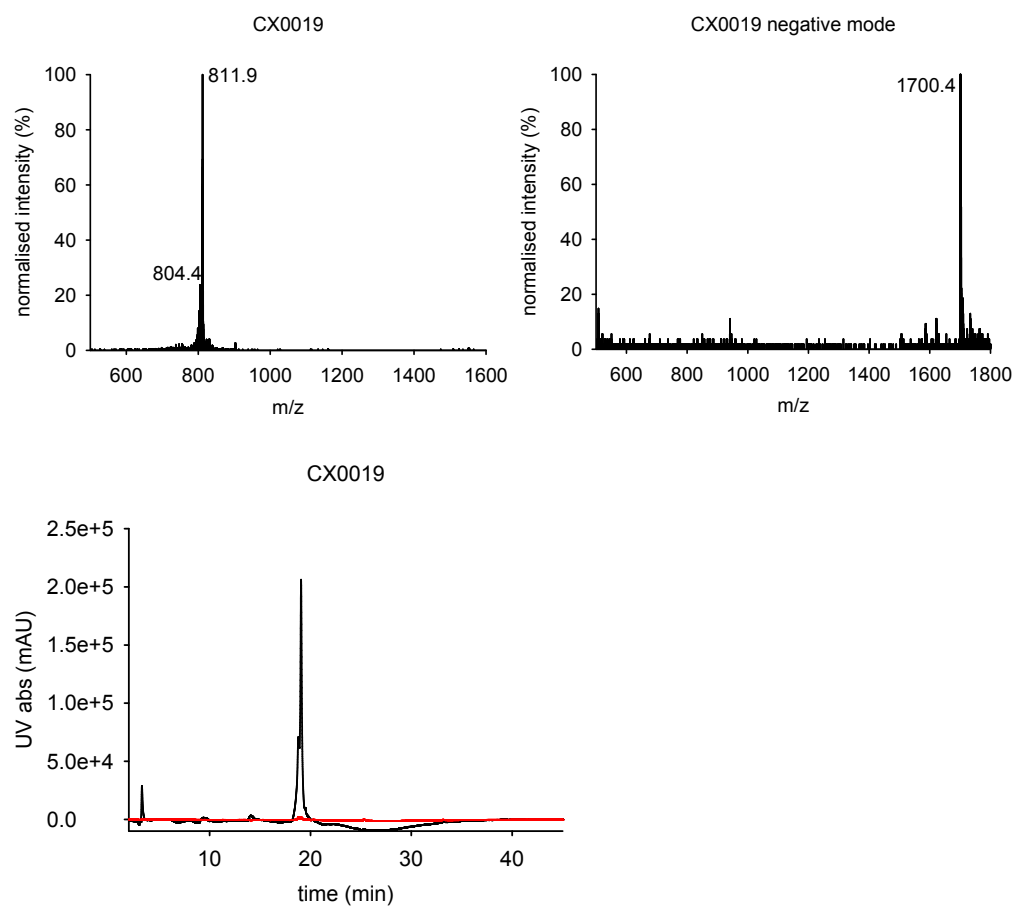

**Figure S11.** Mass spectra in positive and negative mode and analytical RP-HPLC trace for PnIA-NH<sub>2</sub>.  $MW_{calc}$ : 1701.9,  $MW_{obs}$ : 1621.8 (positive mode); 1701.4 (negative mode).

## 2. Binding of AnIB and PnIA

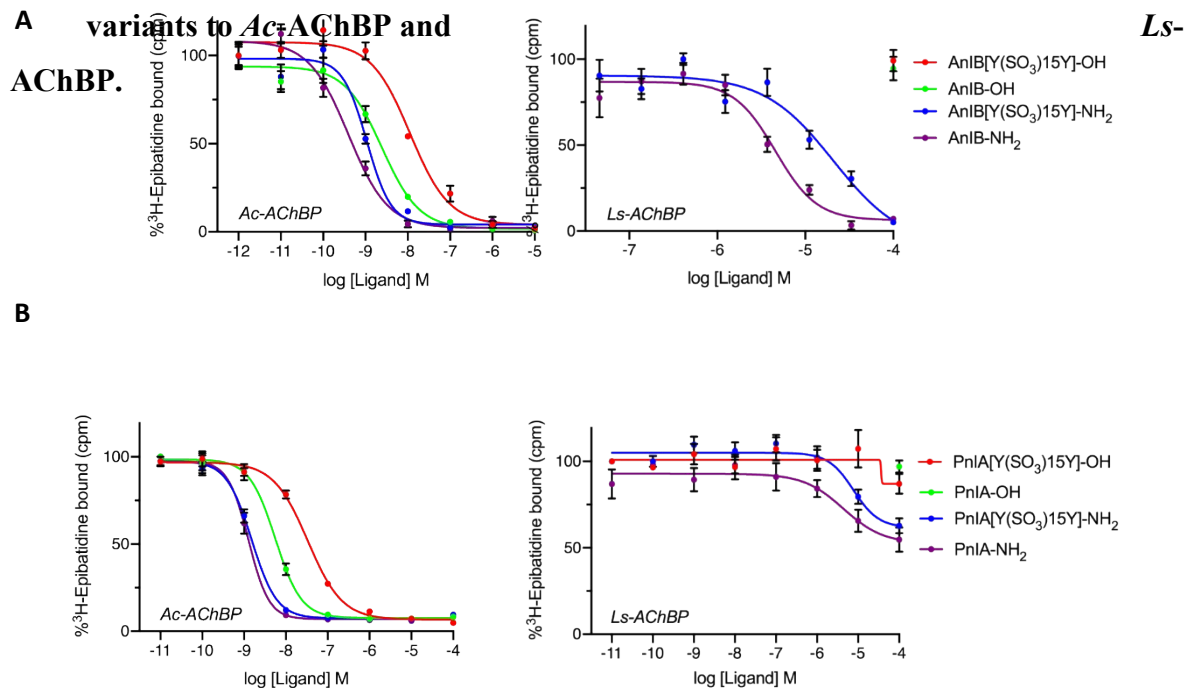

**Figure S2.** Displacement of  $[^3\text{H}]$ -epibatidine from *Ac-AChBP* by (A) *AnIB* and (B) *PnIA* variants. Data represent mean  $\pm$  SEM of triplicate data from three independent experiments.

### 3. Secondary H $\alpha$ NMR chemical shifts of PnIA[Y(SO<sub>3</sub>)15Y]-NH<sub>2</sub> conformations.

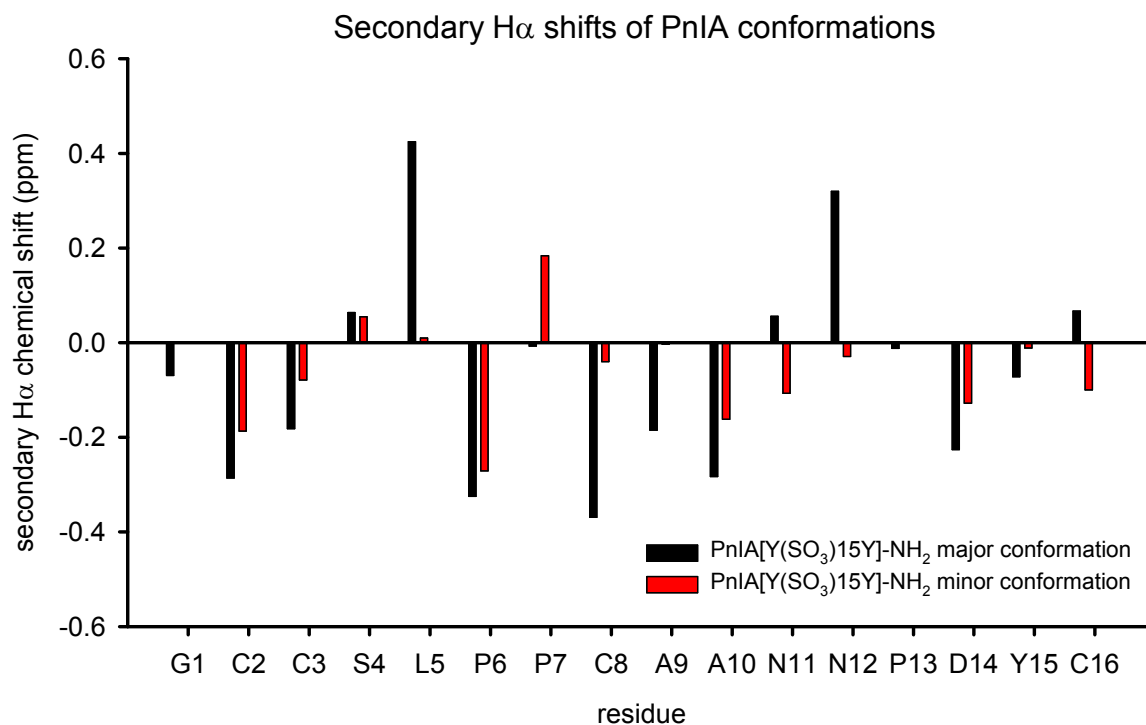

**Figure S3.** Secondary H $\alpha$  NMR chemical shifts of PnIA[Y(SO<sub>3</sub>)15Y]-NH<sub>2</sub> conformations. Spectra were referenced to 2,2-dimethyl-2-silapentane-5-sulfonate sodium salt (DSS) as an internal reference<sup>1</sup> and secondary H $\alpha$  chemical shifts (ppm) were calculated as the difference between the measured chemical shift and the respective random coil shift from Whishart et al.<sup>2</sup>

#### 4. Structures of AnIB variants.

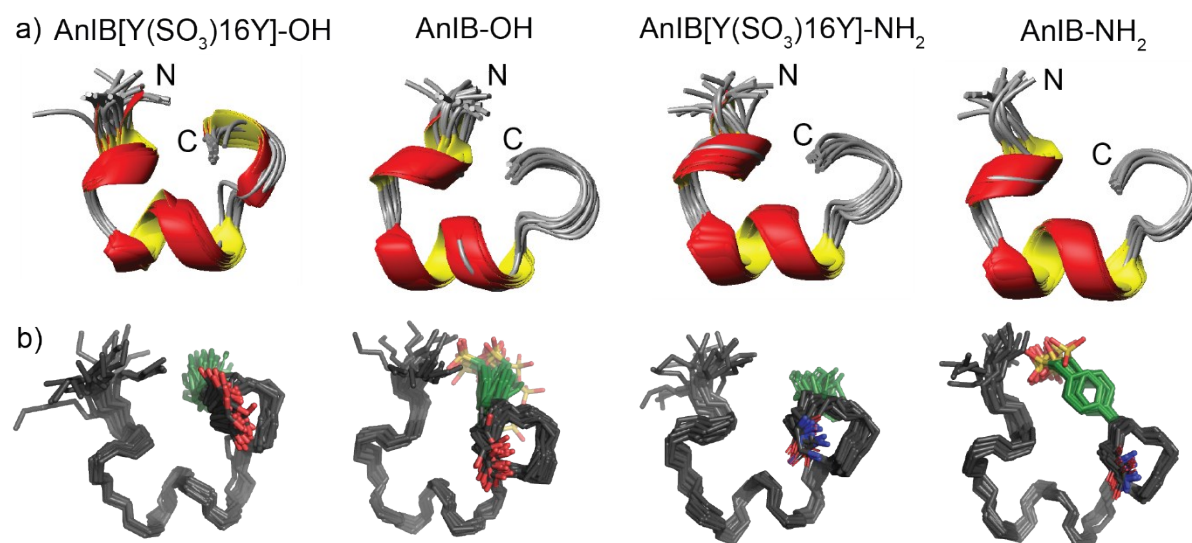

**Figure S4.** Ensembles of 20 structures of AnIB variants with lowest energies and best MolProbity scores in (a) cartoon representation showing the  $\alpha$ -helical regions (figures generated in MolMol) and (b) stick representation with backbone in grey, (sulfo)tyrosine in green and the C-terminal carboxylic acid/amide coloured by element type (figures generated in Pymol).

#### 5. Structure of PnIA-NH<sub>2</sub>.

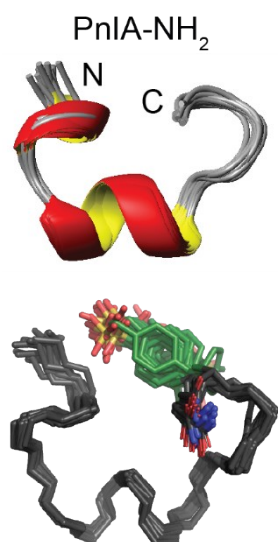

**Figure S5.** Ensemble of 20 structures of PnIA-NH<sub>2</sub> with lowest energies and best MolProbity scores in (a) cartoon representation showing the  $\alpha$ -helical regions (figures generated in MolMol) and (b) stick representation with backbone in grey, (sulfo)tyrosine in green and the C-terminal carboxylic acid/amide coloured by element type (figures generated in Pymol).

**Table S1. NMR structure calculation statistics for EpI variants**

|                                 | EpI[Y(SO <sub>3</sub> ) <sub>15</sub> Y]-<br>OH | EpI-OH          | EpI[Y(SO <sub>3</sub> ) <sub>15</sub> Y]-<br>NH <sub>2</sub> | EpI-NH <sub>2</sub> |
|---------------------------------|-------------------------------------------------|-----------------|--------------------------------------------------------------|---------------------|
| <b>Energies (kcal/mol)</b>      |                                                 |                 |                                                              |                     |
| Overall                         | -586.49 ± 22.50                                 | -570.14 ± 27.18 | -536.68 ± 31.76                                              | -517.00 ± 19.15     |
| Bonds                           | 4.87 ± 0.67                                     | 5.17 ± 0.92     | 4.22 ± 0.47                                                  | 4.67 ± 0.55         |
| Angles                          | 16.51 ± 2.17                                    | 18.34 ± 5.81    | 12.88 ± 2.08                                                 | 16.75 ± 2.52        |
| Improper                        | 5.24 ± 1.12                                     | 6.28 ± 1.93     | 5.27 ± 0.92                                                  | 6.83 ± 2.09         |
| Dihedral                        | 68.62 ± 0.89                                    | 69.24 ± 1.49    | 68.96 ± 1.54                                                 | 71.85 ± 1.23        |
| Van der Waals                   | -52.34 ± 4.31                                   | -49.69 ± 3.69   | -55.11 ± 2.45                                                | -52.80 ± 3.58       |
| Electrostatic                   | -629.48 ± 22.58                                 | -619.57 ± 33.41 | -572.93 ± 31.66                                              | -564.49 ± 20.65     |
| NOE                             | 0.030 ± 0.0070                                  | 0.033 ± 0.016   | 0.025 ± 0.0079                                               | 0.027 ± 0.010       |
| cDih                            | 0.071 ± 0.080                                   | 0.062 ± 0.094   | 0.0080 ± 0.021                                               | 0.16 ± 0.14         |
| <b>MolProbity Statistics</b>    |                                                 |                 |                                                              |                     |
| Clashes (> 0.4<br>Å/1000 atoms) | 7.84 ± 3.37                                     | 7.48 ± 6.45     | 7.14 ± 4.35                                                  | 6.56 ± 4.01         |
| Poor rotamers                   | 0                                               | 0               | 0                                                            | 4.28 ± 3.59         |
| Ramachandran<br>Outliers (%)    | 0.36 ± 1.60                                     | 2.08 ± 3.70     | 0                                                            | 0                   |
| Ramachandran<br>Favoured (%)    | 99.29 ± 2.20                                    | 92.50 ± 3.73    | 99.64 ± 1.60                                                 | 100                 |
| MolProbity score                | 1.44 ± 0.18                                     | 1.66 ± 0.50     | 1.33 ± 0.28                                                  | 1.65 ± 0.40         |
| MolProbity score<br>percentile  | 95.30 ± 3.31                                    | 84.05 ± 14.14   | 96.50 ± 3.35                                                 | 86.05 ± 13.43       |
| <b>Atomic RMSD (Å)</b>          |                                                 |                 |                                                              |                     |
| Mean global<br>backbone         | 0.79 ± 0.34                                     | 1.23 ± 0.42     | 0.57 ± 0.18                                                  | 0.62 ± 0.19         |
| Mean global heavy               | 1.32 ± 0.31                                     | 1.83 ± 0.34     | 1.16 ± 0.19                                                  | 1.38 ± 0.26         |
| <b>Experimental Restraints</b>  |                                                 |                 |                                                              |                     |
| <b>Distance restraints</b>      |                                                 |                 |                                                              |                     |
| Short range (i-j < 2)           | 110                                             | 104             | 98                                                           | 83                  |
| Medium range (i-j <<br>5)       | 39                                              | 37              | 39                                                           | 37                  |
| Long range (i-j ≥ 5)            | 3                                               | 2               | 12                                                           | 14                  |

|                                  |     |     |     |     |
|----------------------------------|-----|-----|-----|-----|
| Hydrogen bond restraints         | 4   | 3   | 4   | 4   |
| Total                            | 156 | 146 | 153 | 138 |
| <b>Dihedral angle restraints</b> |     |     |     |     |
| phi                              | 9   | 9   | 9   | 9   |
| psi                              | 11  | 11  | 11  | 11  |
| chi1                             | 5   | 5   | 4   | 4   |
| Total                            | 25  | 25  | 24  | 24  |

**Table S2. NMR structure calculation statistics for AnIB variants**

|                              | <b>AnIB[Y(SO<sub>3</sub>)<sub>16</sub>Y]-OH</b> | <b>AnIB-OH</b>  | <b>AnIB[Y(SO<sub>3</sub>)<sub>16</sub>Y]-NH<sub>2</sub></b> | <b>AnIB-NH<sub>2</sub></b> |
|------------------------------|-------------------------------------------------|-----------------|-------------------------------------------------------------|----------------------------|
| <b>Energies (kcal/mol)</b>   |                                                 |                 |                                                             |                            |
| Overall                      | -511.93 ± 17.11                                 | -515.24 ± 24.58 | -538.22 ± 17.95                                             | -619.69 ± 25.57            |
| Bonds                        | 4.20 ± 0.59                                     | 4.62 ± 0.43     | 3.78 ± 0.46                                                 | 3.93 ± 0.40                |
| Angles                       | 11.85 ± 1.67                                    | 14.93 ± 1.82    | 9.62 ± 1.07                                                 | 10.07 ± 1.53               |
| Improper                     | 5.66 ± 1.47                                     | 7.80 ± 2.88     | 4.52 ± 0.96                                                 | 3.94 ± 0.73                |
| Dihedral                     | 71.39 ± 0.85                                    | 72.99 ± 0.99    | 71.83 ± 0.75                                                | 71.02 ± 0.69               |
| Van der Waals                | -52.39 ± 3.32                                   | -53.39 ± 3.48   | -54.39 ± 2.73                                               | -59.32 ± 2.84              |
| Electrostatic                | -552.74 ± 19.30                                 | -562.44 ± 25.81 | -573.66 ± 18.43                                             | -649.57 ± 25.69            |
| NOE                          | 0.0064 ± 0.0055                                 | 0.033 ± 0.0083  | 0.0099 ± 0.0043                                             | 0.010 ± 0.0045             |
| cDih                         | 0.095 ± 0.11                                    | 0.22 ± 0.29     | 0.066 ± 0.098                                               | 0.24 ± 0.14                |
| <b>MolProbity Statistics</b> |                                                 |                 |                                                             |                            |
| Clashes (> 0.4 A/1000 atoms) | 3.38 ± 3.17                                     | 9.49 ± 5.10     | 3.62 ± 2.66                                                 | 7.11 ± 3.61                |
| Poor rotamers                | 0                                               | 0               | 0.83 ± 2.56                                                 | 0                          |
| Ramachandran Outliers (%)    | 0                                               | 0.38 ± 1.72     | 0.33 ± 1.49                                                 | 0.77 ± 2.37                |
| Ramachandran Favoured (%)    | 96.33 ± 4.03                                    | 96.54 ± 3.93    | 90.67 ± 5.88                                                | 93.08 ± 5.52               |
| MolProbity score             | 1.20 ± 0.46                                     | 1.67 ± 0.25     | 1.57 ± 0.41                                                 | 1.71 ± 0.38                |
| MolProbity score percentile  | 95.90 ± 5.34                                    | 88.20 ± 9.24    | 88.90 ± 8.97                                                | 85.20 ± 9.17               |

| <b>Atomic RMSD (Å)</b>           |             |             |             |             |
|----------------------------------|-------------|-------------|-------------|-------------|
| Mean global backbone             | 1.28 ± 0.43 | 1.15 ± 0.43 | 1.25 ± 0.51 | 0.96 ± 0.38 |
| Mean global heavy                | 1.44 ± 0.33 | 1.51 ± 0.36 | 1.30 ± 0.33 | 1.18 ± 0.25 |
| <b>Experimental Restraints</b>   |             |             |             |             |
| <b>Distance restraints</b>       |             |             |             |             |
| Short range (i-j < 2)            | 75          | 65          | 81          | 98          |
| Medium range (i-j < 5)           | 22          | 21          | 33          | 49          |
| Long range (i-j ≥ 5)             | 4           | 10          | 9           | 11          |
| Hydrogen bond restraints         | 0           | 0           | 0           | 0           |
| Total                            | 101         | 96          | 123         | 158         |
| <b>Dihedral angle restraints</b> |             |             |             |             |
| phi                              | 12          | 11          | 9           | 10          |
| psi                              | 13          | 12          | 10          | 11          |
| chi1                             | 7           | 5           | 8           | 9           |
| Total                            | 32          | 28          | 27          | 30          |

**Table S3. NMR structure calculation statistics for PnIA-NH<sub>2</sub>**

|                            | <b>PnIA-NH<sub>2</sub></b> |
|----------------------------|----------------------------|
| <b>Energies (kcal/mol)</b> |                            |
| Overall                    | -507.63 ± 37.48            |
| Bonds                      | 4.28 ± 0.50                |
| Angles                     | 17.67 ± 2.44               |
| Improper                   | 4.68 ± 1.36                |
| Dihedral                   | 64.66 ± 0.74               |
| Van der Waals              | -47.38 ± 3.05              |
| Electrostatic              | -551.74 ± 36.03            |
| NOE                        | 0.070 ± 0.0043             |
| cDih                       | 0.13 ± 0.10                |

|                                  |              |
|----------------------------------|--------------|
| <b>MolProbity Statistics</b>     |              |
| Clashes (> 0.4 Å/1000 atoms)     | 15.21 ± 5.26 |
| Poor rotamers                    | 0            |
| Ramachandran Outliers (%)        | 0            |
| Ramachandran Favoured (%)        | 100          |
| MolProbity score                 | 1.66 ± 0.17  |
| MolProbity score percentile      | 89.65 ± 4.74 |
| <b>Atomic RMSD (Å)</b>           |              |
| Mean global backbone             | 0.60 ± 0.19  |
| Mean global heavy                | 1.23 ± 0.40  |
| <b>Experimental Restraints</b>   |              |
| <b>Distance restraints</b>       |              |
| Short range (i-j < 2)            | 74           |
| Medium range (i-j < 5)           | 36           |
| Long range (i-j > 5)             | 8            |
| Hydrogen bond restraints         | 4            |
| Total                            | 122          |
| <b>Dihedral angle restraints</b> |              |
| phi                              | 9            |
| psi                              | 11           |
| chi1                             | 0            |
| Total                            | 20           |



## 6. Crystal structure of PnIA[A10L, D14K] in complex with Ac-AChBP (PDB: 2BR8).

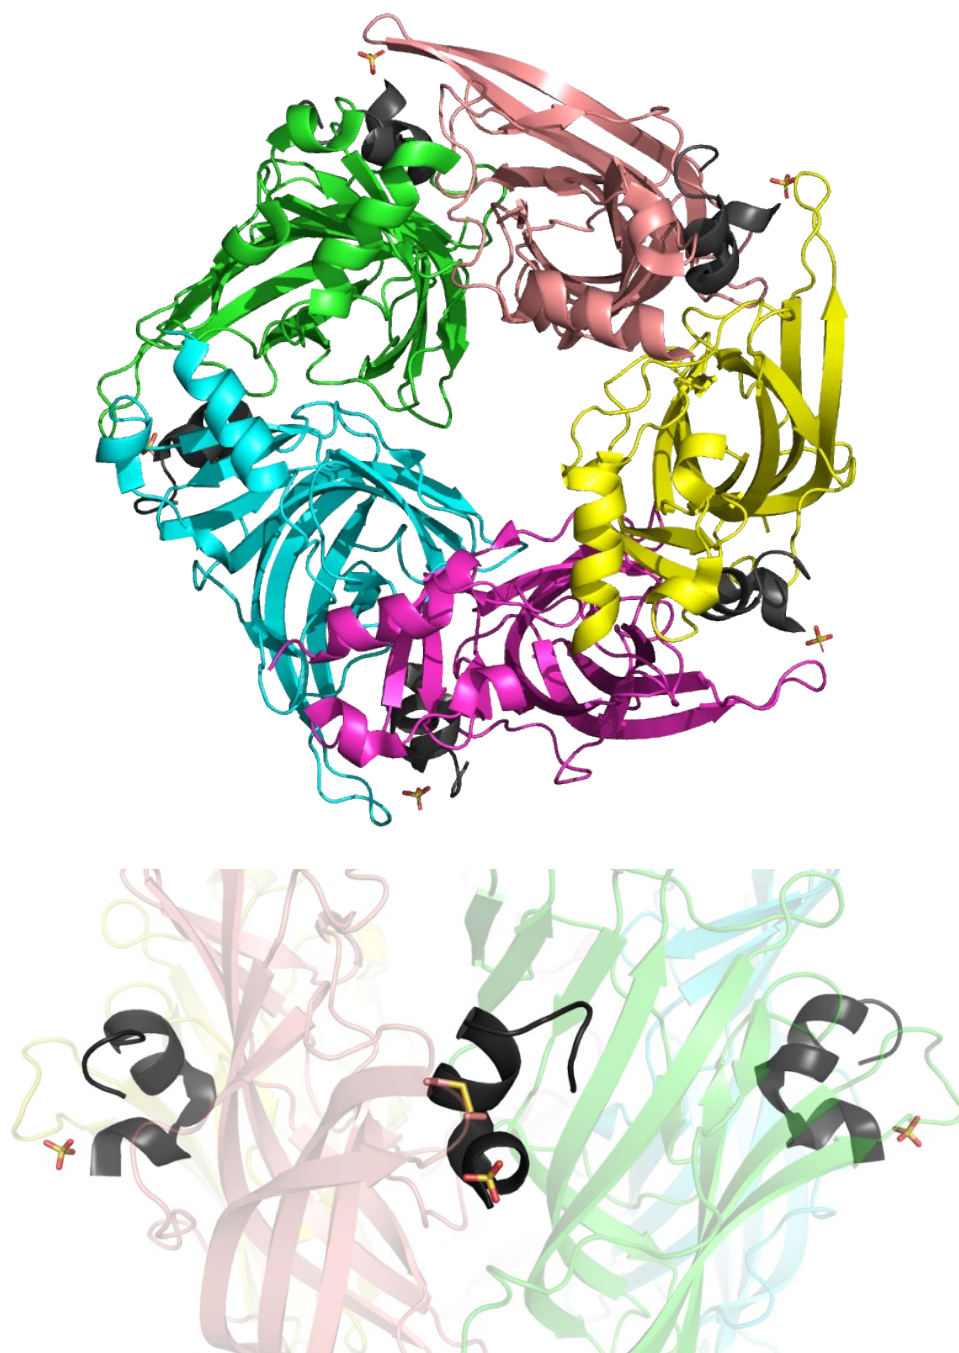

**Figure S6.** Cartoon structure of PnIA[A10L, D14K] (grey) in complex with Ac-AChBP (subunits coloured yellow, pink, green, cyan and magenta) showing binding of PnIA[A10L, D14K] at the interfaces of each of the five subunits (PDB: 2BR8)(top).<sup>3</sup> The central helical segment of PnIA[A10L, D14K] is mostly buried in the binding site while the N- and C-termini are exposed. A buffer sulfate ion that was observed in the crystal structure is shown as sticks and coloured by element, suggesting a possible position for the sulfotyrosine residue for native (sulfated and amidated) PnIA, potentially interacting with a disulfide bond (Cys188-Cys189) in the receptor (bottom).

## References

1. Wishart, D. S.; Bigam, C. G.; Yao, J.; Abildgaard, F.; Dyson, H. J.; Oldfield, E.; Markley, J. L.; Sykes, B. D., <sup>1</sup>H, <sup>13</sup>C and <sup>15</sup>N chemical shift referencing in biomolecular NMR. *J. Biomol. NMR* **1995**, *6*, 135-140.
2. Wishart, D. S.; Bigam, C. G.; Holm, A.; Hodges, R. S.; Sykes, B. D., <sup>1</sup>H, <sup>13</sup>C and <sup>15</sup>N random coil NMR chemical shifts of the common amino acids. I. Investigations of nearest-neighbor effects. *J. Biomol. NMR* **1995**, *5*, 67-81.
3. Celie, P. H., et al., Crystal structure of nicotinic acetylcholine receptor homolog AChBP in complex with an alpha-conotoxin PnIA variant. *Nat. Struct. Mol. Biol.* **2005**, *12*, 582-588.
